1 **Title**

2 Human Respiratory Syncytial Virus-induced immune signature of infection revealed by  
3 transcriptome analysis of clinical pediatric nasopharyngeal swab samples

4

5 **Authors**

6 Claire NICOLAS DE LAMBALLERIE<sup>1,2</sup>, Andrés PIZZORNO<sup>1</sup>, Julia DUBOIS<sup>1</sup>, Blandine  
7 PADEY<sup>1</sup>, Thomas JULIEN<sup>1,3</sup>, Aurélien TRAVERSIER<sup>1</sup>, Julie CARBONNEAU<sup>4</sup>, Elody  
8 ORCEL<sup>2</sup>, Bruno LINA<sup>1</sup>, Marie-Eve HAMELIN<sup>4</sup>, Magali ROCHE<sup>2</sup>, Julien TEXTORIS<sup>5</sup>, Guy  
9 BOIVIN<sup>4</sup>, Catherine LEGRAS-LACHUER<sup>2,6</sup>, Olivier TERRIER<sup>1#</sup>, Manuel ROSA-  
10 CALATRAVA<sup>1,3#</sup>

11

12 #OT and MRC are co-last authors

13

14 **Affiliations**

15 1) CIRI, Centre International de Recherche en Infectiologie, (Team VirPath), Univ Lyon,  
16 Inserm, U1111, Université Claude Bernard Lyon 1, CNRS, UMR5308, ENS de Lyon, F-  
17 69007, Lyon, France.

18 2) Virosan3D SAS, Lyon 69008, France.

19 3) VirNext, Faculté de Médecine RTH Laennec, Université Claude Bernard Lyon 1,  
20 Université de Lyon, Lyon 69008, France.

21 4) Research Center in Infectious Diseases of the CHU de Quebec and Laval University,  
22 Quebec City, QC G1V 4G2, Canada.

23 5) Pathophysiology of Injury-Induced Immunosuppression (PI3), EA 7426 Hospices Civils de  
24 Lyon, bioMérieux, Université Claude Bernard Lyon 1, Hôpital Edouard Herriot, Lyon  
25 69003, France.

26 6) Ecologie Microbienne, UMR CNRS 5557, USC INRA 1364, Université Claude Bernard  
27 Lyon 1, Université de Lyon, Villeurbanne 69100, France.

28

29 **Corresponding authors**

30 olivier.terrier@univ-lyon1.fr; manuel.rosa-calatrava@univ-lyon1.fr

31

32 **Keywords**

33 Respiratory Syncytial Virus; DNA microarray; Transcriptome; Nasal epithelium; NanoString  
34 assay

35

36 **Running title**

37 Patient-derived HRSV infection signature

38

39 **Abstract**

40 Human Respiratory Syncytial Virus (HRSV) constitutes one the main causes of respiratory  
41 infection in neonates and infants worldwide. Transcriptome analysis of clinical samples using  
42 high-throughput technologies remains an important tool to better understand virus-host  
43 complex interactions in the real-life setting but also to identify new diagnosis/prognosis  
44 markers or therapeutics targets. A major challenge when exploiting clinical samples such as  
45 nasal swabs, washes or bronchoalveolar lavages is the poor quantity and integrity of nucleic  
46 acids. In this study, we applied a tailored transcriptomics workflow to exploit nasal wash  
47 samples from children who tested positive for HRSV. Our analysis revealed a characteristic  
48 immune signature as a direct reflection of HRSV pathogenesis and highlighted putative  
49 biomarkers of interest.

50

## 51 **Background**

52 Respiratory Syncytial Virus (HRSV) constitutes one of the main causes of respiratory tract  
53 infection in newborns and young children worldwide [1] but also in the elderly,  
54 immunocompromised, and patients with chronic heart and lung conditions [2]. The global  
55 HRSV disease burden is estimated at approximately 200,000 deaths and more than 3 million  
56 hospitalizations per year [1,3]. Despite numerous attempts and ongoing clinical trials, no  
57 efficacious HRSV vaccine is yet available, and the specific therapeutic arsenal currently  
58 available is very limited and remains relatively expensive [4]. In this context, we urgently  
59 need to increase our understanding of HRSV pathogenesis and the multiple facets of its  
60 virus/host interactions.

61 Much of the HRSV-induced disease is considered as the reflection of the host innate immune  
62 response to infection [5,6], with respiratory epithelial cells and monocytes/macrophages being  
63 the main actors in this response [7,8]. Indeed, HRSV infection was previously shown to up-  
64 regulate the expression of host genes involved in the antiviral and cell-mediated immune  
65 responses, such as genes coding for interferons (IFNs) and more largely several  
66 cytokines/chemokines such as CXCL10/IP-10, CXCL8/IL-8, MCP-1/CCL2, RANTES/CCL5  
67 or IL6 [8]. For example, we previously demonstrated that HRSV infection, alone or in the  
68 context of bacterial co-infection, strongly promotes CXCL10/IP-10 expression in human  
69 macrophages [9]. We also showed that HRSV infection of human respiratory epithelial cells  
70 induces a strong disequilibrium in the p53/NF- $\kappa$ B balance, which appears to contribute to the  
71 up-regulation of several proinflammatory cytokines and chemokines [10]. One limitation of  
72 these *in vitro* approaches is that they do not necessarily reflect the whole complexity of the *in*  
73 *vivo* environment. In this context, we advantageously investigated the HRSV-induced host  
74 response using an innovative and highly relevant primary human reconstituted airway  
75 epithelial model, cultivated at the air-liquid interface to assess previously undescribed facets

76 of the HRSV biology, such as the impact of the infection on cilium mobility and  
77 morphogenesis [11].

78 The development of high-throughput “omics” approaches has contributed to deepen our  
79 understanding of the multiple levels of interplay between respiratory viruses and the host cell  
80 [12–15]. These approaches, in addition to be very informative about the dynamic interplay  
81 between the virus and the host and hence the pathogenesis mechanisms, could also constitute  
82 a powerful tool to identify new therapeutic targets and/or propose novel antiviral strategies. In  
83 the case of HRSV, few studies have investigated the transcriptomic host response using  
84 clinical specimens, and an even more limited number have exploited respiratory tract samples  
85 [16–18]. A major challenge associated with transcriptome analysis of clinical samples is the  
86 intrinsic low copy number and/or low integrity of the nucleic acids recovered. To tackle these  
87 hassles, several research groups, including ours, have proposed and developed  
88 adapted/optimized sample processes [19–21].

89 In this study, we investigated the impact of the infection on the host cell using nasal washes  
90 from hospitalized children with lab-confirmed HRSV infection. Samples were processed with  
91 adapted protocols and transcriptomic signatures were obtained by hybridization on the  
92 HuGene 2.0 st Affymetrix microarray and subsequent process of the data. We compared our  
93 results to published pediatrics blood microarray datasets for the establishment of a nasal-  
94 specific signature. We also included biological results obtained using our previously  
95 described relevant human reconstituted airway epithelial (HAE) model of HRSV infection [11]  
96 for a deeper comprehension of the virus impact on the host epithelium. The analysis of  
97 HRSV-induced gene expression signature validated the importance of several IFN and  
98 cytokine-related pathways, in line with previous studies, but also provided valuable insight on  
99 potential biomarkers of diagnostic interest or as surrogates for the evaluation of future  
100 innovative treatments.

## 101 **Methods**

102

### 103 *Clinical samples and ethical considerations*

104 Written consent was obtained from parents of the three hospitalized children with lab-  
105 confirmed HRSV infections. Control samples come from the collection of samples  
106 established by the Québec CHU in the context of RespiVir surveillance study. The protocol  
107 was approved by Ethics committee of the CHU de Québec-Université Laval. Nasal wash  
108 samples were collected in RNAlater® Stabilization Solution (Thermo Fisher Scientific).

109

### 110 *RNA extraction and microarray experiment*

111 Isolation of total RNA from nasal washes was performed using the RNeasy Micro kit  
112 (QIAGEN) with Dnase I treatment following the manufacturer's instructions. Samples were  
113 quantified using the Quantifluor RNA System (Promega) and qualified using Agilent RNA  
114 6000 Pico chip on Bioanalyzer 2100 (Agilent Technologies) according to manufacturer's  
115 instructions. Whole RNA amplification using three rounds of in vitro transcription was then  
116 performed in two steps. First, the ExpressArt Trinucleotide mRNA amplification Pico kit  
117 (Amp Tec) was used for RNA amplification using trinucleotide and IVT transcription with a  
118 minimal input requested of 100pg. Then, ss-cDNA synthesis was performed with the  
119 GeneChip® WT PLUS Reagent Kit (Affymetrix) with a minimal input requested of 5.5 µg.  
120 cRNA and ss-cDNA quality control was assessed (Nanodrop and Bioanalyzer). Labeled  
121 cRNA was hybridized to GeneChip Human Gene 2.0 ST Array (Affymetrix) for 16h at 45°C  
122 and scanned using the Affymetrix 3000 7G Scanner. .CEL file generation and basic quality  
123 controls were performed with the GeneChip™ Command Console® (Affymetrix).

124

### 125 *Data analysis*

126 Data were analyzed using the R software and its xps (eXpression Profiling System) package  
127 (version 1.32.0) downloaded from [www.bioconductor.org](http://www.bioconductor.org). The source files (CLF, PGF and  
128 transcript files) were downloaded from the Affymetrix website  
129 (<http://www.affymetrix.com/site/mainPage.affx>). Quality controls were performed to assess  
130 technical bias, RNA degradation levels and background noise. Preprocessing steps consisted  
131 in background correction, RMA normalization, probe summarization, and log<sub>2</sub> transformation.  
132 A linear model was used to assess differential expression with the limma (Linear Models for  
133 Microarray Data) R/Bioconductor software package [22]. Genes were considered for  
134 subsequent analysis if they exhibited at least a 2-fold change in expression levels compared to  
135 the control samples coupled with p-values < 0.05. In order to further functionally characterize  
136 the patient transcriptomic signature, the web-based tool DAVID 6.8 was used to determine  
137 the enriched pathways [23]. Genes predicted by TargetScan 7.2 [24] to be targeted by the up-  
138 or down- regulated miRNAs with cumulative weighted score < -0.5 were used for functional  
139 enrichment analysis using the same web-based tool. To further comprehend the connexions  
140 between the modulated genes in our study, we chose to represent the interactome as a graph  
141 where nodes correspond with proteins and edges with pairwise interactions using the web-  
142 based tool STRING **11.0** [30] (<https://string-db.org>), paired with Markov Clustering (MCL  
143 [26]) in order to extract relevant modules from such graphs.

144

#### 145 *Pediatric mRNA datasets*

146 We chose three datasets from HRSV-infected host transcriptomic studies publicly available  
147 on Gene Expression Omnibus database (GEO) and ArrayExpress. Two of them used  
148 peripheral pediatric blood samples (GSE69606 & E-MTAB-5195) and the third one focussed  
149 on PBMC gene expression responses to infection (GSE34205 ; n=51 HRSV-infected & n=10  
150 controls). We extracted raw data corresponding severe disease samples from the series

151 GSE69606 (n=8) and MTAB-5195 (n=18) and the recovery corresponding samples or healthy  
152 control samples (each n=8). Raw data were processed as previously described and differential  
153 analysis was performed according to the same thresholds ( $p$ -value  $< 0.05$  and absolute fold-  
154 change  $> 2$ ). We then compared the subsequent gene lists for tissue-specific gene expression  
155 assessment.

156

### 157 *Reconstituted human airway epithelia (HAE) and viruses*

158 To counter for ultra-low nucleic acid quantities, the MucilAir® human airway epithelia (HAE)  
159 from Epithelix SARL was used for validation purposes. These HAE were maintained in air-  
160 liquid interphase with specific MucilAir® Culture Medium in Costar Transwell inserts  
161 (Corning) according to the manufacturer's instructions. As previously described, apical poles  
162 were gently washed with warm PBS and then infected with a 150- $\mu$ L dilution of HRSV-A  
163 (Long) virus in OptiMEM medium (Gibco, ThermoFisher Scientific) at a MOI of 1. Control  
164 HAE were mock-infected in the same conditions with MucilAir® Culture Medium with  
165 OptiMEM as the inoculum. After 6 days, total tissue lysates were harvested and total RNA  
166 was extracted as previously described [11,21]. The Human Respiratory syncytial virus  
167 (HRSV-A Long strain ATCC-VR26) was produced in LLCMK2 cells (ATCC CCL7) in  
168 EMEM supplemented with 2 mM L-glutamine (Sigma Aldrich), penicillin (100 U/mL),  
169 streptomycin (100  $\mu$ g/mL) (Lonza), at 37 °C and 5% CO<sub>2</sub>.

170

### 171 *NanoString nCounter validation*

172 The nCounter platform (NanoString technologies) was used for mRNA detection of a 86  
173 gene panel, according to manufacturer's instructions [27]. This custom panel gathers  
174 immunity-related genes (cytokine production, proliferation T cells, interferon-gamma-  
175 mediated signaling pathway, among others). 300 ng of total RNA were hybridized to the



176 probes at 67°C for 18 hours using a thermocycler (Biometra, Tprofessional TRIO, Analytik  
177 Jena AG, Jena, Germany). After removal of excessive probes, samples were loaded into the  
178 nCounter Prep Station (NanoString Technologies) for purification and immobilization onto  
179 the internal surface of a sample cartridge for 2-3 hours. The sample cartridge was then  
180 transferred and imaged on the nCounter Digital Analyzer (NanoString Technologies) where  
181 color-codes were counted and tabulated for the 86 genes. Counts number were normalized by  
182 the geometric mean of HPRT1 (NM\_000194.1), DECR1 (NM\_001359.1), RPL19  
183 (NM\_000981.3), POLR2A (NM\_000937.2) and TBP (NM\_001172085.1) housekeeping  
184 genes count number, as well as the negative and positive control values using nSolver  
185 analysis software (version 4.0, NanoString technologies). Gene expression results are  
186 expressed in fold change induction compared to the mock-infected condition.

187

188

## 189 **Results**

### 190 *Differential gene expression in HRSV-infected samples*

191 In this study, we assessed nasal airway gene expression on pediatric nasal wash samples (3  
192 infected and 5 controls). Given the low quality and low integrity of these sensitive samples  
193 (quality status available in **Supplementary table 1**), previously published adapted protocols  
194 were successfully used for their amplification and their subsequent hybridization on an  
195 Affymetrix GeneChip™ Human Gene 2.0ST [19]. An overview of the customized sample  
196 process and workflow is presented in **Figure 1A** and the subsequent hierarchical clustering of  
197 all analyzed samples is featured in **Figure 1B**. Despite the known heterogeneity of clinical  
198 samples, HRSV-infected and non-infected samples clustered appropriately to their  
199 corresponding experimental group.

200 For differential analysis, genes were considered significantly modulated if they exhibited at  
201 least a 2-fold change in expression levels compared to the control samples, with p-values  
202 inferior or equal to 0.05. Using these criteria, we listed a total of 296 differentially expressed  
203 genes, 258 (87.16%) of them being up-regulated (**Supplementary table 2**). This unbalanced  
204 up- *versus* down-regulated ratio was quite in line with previous observations [11]. As  
205 expected in the context of infected samples, many significantly up-regulated genes with fold  
206 changes far above 5 were related to the immune and IFN responses, such as ISG15, OASL,  
207 CXCL10/IP-10, CCL2-3, IFITM1-3 or IRF1 (**Supplementary table 2**). In contrast, among  
208 the 38 down-regulated genes, we listed genes associated with protein heterodimerization  
209 activity (SRGAP2C, HIST3H2BB and NTSR1), genes encoding zinc finger protein (ZNF439,  
210 ZNF28, ZNF286B, ZNF500) or transmembrane proteins acting as receptors or T-cell co-  
211 activators (such as SLC7A5P1, MSLNL or NTSR1). Of note, an important fraction (26%) of  
212 the down-regulated genes was represented by miRNAs, such as hsa-miR-572, hsa-miR-486-2,  
213 hsa-miR-1229 or hsa-miR-663b (**Supplementary table 2**). Aside from miRNAs, only 3  
214 other down-regulated genes (KIR3DL2, SLC7A5P1 and SRGAP2C) had fold changes lower  
215 than -3.

216

### 217 *Gene Ontology-based functional enrichment analysis*

218 To provide further functional interpretation of these clinical transcriptomic signatures, we  
219 then performed a Gene Ontology (GO)-based functional enrichment analysis using the web-  
220 based DAVID v6.8 toolkit (<https://david.ncifcrf.gov/>). GO terms, and particularly Biological  
221 Processes (BP), were considered enriched if their fold enrichment was higher than 2 and the  
222 Benjamini-Hochberg corrected enrichment p-value was inferior to 0.05. This BP enrichment  
223 was based on the global list of deregulated genes (**Figure 2**). As anticipated, the most  
224 enriched BP were primarily associated with interferon response (ex: GO:0060337;

225 GO:0060333), response to virus (ex: GO:0009615; GO:0051607) or antigen processing (ex:  
226 GO:0002479; GO:0042612), which represent 16 out of the 24 most enriched BP listed  
227 (**Figure 2A**). Interestingly, the remaining GO terms were mainly related to  
228 mitochondria/respiratory burst (ex: GO:0005739; GO:0045730; GO:0045454) or ubiquitin  
229 ligase (ex: GO:0051437; GO:0051436).

230 To better illustrate the impact of HRSV infection on the host immunity-related genes, we used  
231 the list of up-regulated genes and explored the functional association networks of their protein  
232 products using the STRING [25] database (<https://string-db.org>). As presented in **Figure 2B**,  
233 this analysis highlighted a functional network based on 241 distinct proteins (nodes) and 637  
234 protein-protein associations (edges). These associations, which highlight proteins sharing  
235 functions but not necessarily physical interaction, are categorized into 15 relevant clusters,  
236 among which 10 contained more than 3 proteins (each color = 1 cluster by Markov Clustering  
237 [26] or MCL). Two major hubs concentrating a large number of edges were identified. The  
238 main hub consisted of proteins related to the immune response, with a central place for major  
239 actors like CXCL10, OASL and ISG15 (**Figure 2B**, red dots). The second hub harbored  
240 proteins involved in the positive and negative regulation of ubiquitin-protein ligase activity  
241 during the mitotic cell cycle (GO:0051436 and GO:0051437, medium purple dots). This  
242 includes any process that activates, maintains or increases the rate of ubiquitin ligase activity  
243 that contributes to the regulation of the mitotic cell cycle phase transition and vice versa.  
244 Much as the first hub would have been expected in an infectious context, the specific  
245 modulation of genes related to respiratory burst, cell redox homeostasis or ubiquitin-protein  
246 ligase activity by HRSV infection has been less studied.

247 Because of the numerous miRNAs deregulated, we used a prediction algorithm (TargetScan  
248 7.2 [24]) for the identification of all genes targeted by the down- and up- regulated miRNAs.  
249 The predicted genes targeted by the down-regulated miRNAs were related to biological

250 processes such as phagocytosis (GO:0006909), peptide cross-linking (GO:0018149) or  
251 positive regulation of release of cytochrome c from mitochondria (GO:0090200).  
252 Interestingly, the predicted targets of the up-regulated miRNAs are linked to similar processes:  
253 negative regulation of nucleic acid-templated transcription (GO:1903507) and negative  
254 regulation of T cell proliferation (GO:0042130) for the most enriched BPs (**Supplementary**  
255 **Figure 1**).

256

### 257 *Tissue-specific gene expression*

258 In order to describe tissue-specific HRSV infection signatures, differentially expressed gene  
259 lists were extracted from three pediatric mRNA array datasets [28–30] and compared to our  
260 data to highlight similarities and differences between blood and respiratory airway  
261 transcriptional profiles, respectively (**Figure 3**). As previously shown, the overlap between  
262 the blood/PBMC and respiratory tract gene expression is scarce [29]. Only 6 genes (ANXA3,  
263 FCGR1B, OASL, BCL2A1, CLEC4D, RSAD2) were up-regulated in all analyzed datasets,  
264 mostly associated with the host immune response to the infection. As expected, both studies  
265 on peripheral blood shared a specific signature composed of 228 genes, whereas 51 additional  
266 genes were also modulated in PBMCs. These genes are mostly associated with the innate  
267 immune response of the host (GO:0045087). When comparing these signatures with the list of  
268 genes deregulated in our study, we highlighted 242 genes exclusively modulated in nasal  
269 washes, hence constituting specific drivers of the nasal epithelium signature. Among these  
270 tissue-specific modulated genes, genes were associated with the immune response regulation  
271 (GO:0050776) and, more precisely, with type I interferon signaling pathway (GO:0060337),  
272 or antigen processing and presentation (GO:0002479).

273

### 274 *Validation of differential expression in reconstituted human airway epithelium (HAE)*

275 We then sought to validate these results in the context of experimental infections with the  
276 prototype HRSV A Long strain (MOI = 1) in a human reconstituted airway epithelial (HAE)  
277 model, as previously described [11]. This HAE model, issued from healthy donor biopsies, is  
278 composed of human primary ciliated columnar cells, mucus-secreting goblet and basal cells  
279 cultivated at the air-liquid interface, and has been successfully used to study viral infections  
280 and to evaluate the antiviral activity of many compounds in previous studies [11,21]. After 6  
281 days of infection, HAE were lysed and total RNA was extracted and subsequently analyzed  
282 with the NanoString nCounter platform using a customized 94 immunity-related (cytokine  
283 production, T cell proliferation, interferon-gamma-mediated signaling pathway, etc) gene  
284 panel [27]. As shown in **Figure 4**, 39 out of the 94 genes in the NanoString panel were  
285 differentially modulated in the HRSV-infected condition compared to the mock-infected  
286 control. Despite the differential nature of infectious samples, the comparison of global gene  
287 expression modulation results between Affymetrix microarray (clinical samples) and  
288 NanoString (experimental infections in HAE) assays showed a correlation coefficient of 0.63.  
289 Unsurprisingly, the most up-regulated gene in the infectious context is CXCL10/IP-10,  
290 followed by IFI44L, IDO1 and TNFSF13B, with expression ratios above 50 (**Figure 4**). The  
291 top 20 modulated genes are strongly linked to “type I interferon signaling pathway”  
292 (GO:0060337) or more widely to “response to virus” (GO:0009615 or GO:0051607).  
293 Altogether, the gene expression results observed in clinical samples were cross-validated  
294 using an alternative method and underline a global deregulation of the biological defenses of  
295 the host, notably in the case of interferon stimulated genes (ISGs) that constitute a hallmark of  
296 many infectious and/or autoimmune disease states.

297

## 298 **Discussion**

299 In the particular context of HRSV infections, most of the respiratory samples collected for  
300 clinical studies are issued from pediatric patients, from whom only limited amounts of  
301 material are obtained. Moreover, given the fact that the main purpose of patient sampling is  
302 usually clinical analysis rather than research, the low quantity and quality of exploitable  
303 material is far from being optimal. In this study, we showed that these hurdles for the  
304 exploitation of highly degraded clinical samples could be mitigated by using adapted  
305 protocols and microarray, such as the Affymetrix GeneChip Human Gene 2.0 ST. Thus,  
306 despite starting from a limited number of children nasal washes presenting an acute HRSV  
307 infection, our adapted sample-processing pipeline enabled the determination and  
308 characterization of robust pediatric HRSV-induced nasal transcriptome signatures.

309  
310 We initially identified well known markers of HRSV infection, namely the upheaval of the  
311 immune cascade [15–17], notably highlighting the strong overturning of CXCL10/IP-10 gene  
312 expression (coding for C-X-C motif chemokine 10, also known as interferon gamma-induced  
313 protein 10). We then advantageously used a biologically relevant reconstituted human airway  
314 epithelia (HAE) model to reproduce and validate these results by NanoString nCounter assay.  
315 IP-10 has already been described as the most abundant cytokine in bronchoalveolar lavages  
316 collected from HRSV-infected patients [31]. Moreover, our group already showed in a human  
317 monocyte-derived macrophage (MDM) model that the expression of this gene is highly  
318 impacted in the infection context [9]. We also identified up-regulated genes seemingly  
319 commonly modulated in different infection scenarios. For example, HRASLS2 is highly  
320 induced in RV infection [32], FFAR2 promotes internalization during IAV entry [33], and  
321 IFI6 has pleiotropic functions in HRSV, Dengue, or hepatitis C virus infections [34–36].  
322 Conversely, our analysis revealed TMEM190 and MCEMP1 as potential specific biomarkers  
323 of HRSV infection. Although, TMEM190 expression was largely decreased in small airway

324 epithelium by smoking [37] and MCEMP1 was proposed as a biomarker for stroke prognosis  
325 [38], a particular expression profile of these genes has not yet been described on other viral  
326 infections, for which they underscore further study as potential biomarkers. A similar  
327 rationale supports the study of TIMM23, strongly up-regulated in our study. A previous study  
328 conducted by Zaas et al. [15] identified a panel of 15 genes specifically modulated in HRSV-  
329 infected adults, of which FCGR1B, GBP1, RTP4, RSAD2, ISG15, IFIT2 were also  
330 significantly deregulated in our study. Despite the different nature of the biological samples  
331 used (children nasal washes *versus* adult blood), the high degree of concordance observed  
332 between our results and theirs supports a distinctive HRSV infection signature.

333 Using a differentiated, stratified and functional human airway epithelium model *ex vivo*  
334 *in vitro*, we validated a selected set of genes with the NanoString nCounter technology. Of note,  
335 none of the genes had a significant contradictory variation in both experiments. The only  
336 genes down-regulated in the pediatric samples with a fold change close to 1 and up-regulated  
337 with a fold change superior to 2 in the HAE model were IL1A, JAK2, PCGF5, SOCS1 and  
338 STAT2. This apparent discrepancy is coherent given the divergent experimental conditions  
339 (different gene expression technologies, collection timing, and/or nature of the sample  
340 considering the study model lacking immune cells). In this context, the validation of the up-  
341 regulation of 39 major genes of the immune response by the NanoString nCounter assay in  
342 the nasal epithelium model constitutes a relevant confirmation of the local immune disruption  
343 induced by HRSV infection in the nasal tissue. Hence, it consolidates the growing interest of  
344 such an accurate model for the study of viral infections, especially considering the  
345 abovementioned sample limitations in pediatric-oriented infections.

346 Besides those genes related to the immune response, our transcriptomics results also  
347 highlighted the modulation of genes and pathways related to a global mitochondrion cellular  
348 process disruption. This suggests that HRSV infection could unsettle less described biological

349 processes related to the cAMP cascade, the redox complexes of mitochondrial respiratory  
350 chain, namely the respiratory burst. It consists of the production of high levels of reactive  
351 oxygen species (ROS) as a mean to discard internalized particles or pathogens following  
352 infection and phagocytosis. Although, this impact on the respiratory chain is a less explored  
353 aspect of HRSV pathogenesis in the respiratory tract, a study from Bataki et al. [39]  
354 investigated whether HRSV can directly signal to activate neutrophil cytotoxic function or not  
355 in the context of infant bronchiolitis. They assessed that when challenging neutrophils with  
356 diafiltrated HRSV, they could detect a lower activation of oxidative burst than in those  
357 challenged with unwashed virus or with virus free supernatant. Besides HRSV infections, the  
358 respiratory burst is known to be defective in influenza-infected neutrophils or during co-  
359 infections [40,41]. The disruption of such metabolic process could be a first clue regarding  
360 prognostic evolutions of children infected by HRSV.

361 In addition, the biological interpretation of the 38 down-regulated genes is not as  
362 straightforward. Indeed, no biological process or function was significantly enriched in our  
363 study, only modulations of individual gene were highlighted. Some markers, already  
364 described in the context of other viral infections, were found in the top down-regulated genes.  
365 For instance, Epstein–Barr virus (EBV) and human cytomegalovirus (HCMV) respectively  
366 express the viral proteins EBNA-3A and UL18, playing a key role in the antiviral host  
367 response to infection by preventing EBV/HCMV-infected cells from NK cell-mediated  
368 cytolysis [42,43]. This protection is known to be mediated partially by the inhibitory NK cell  
369 receptor KIR3DL2, whose gene expression is strongly inhibited in our HRSV infectious  
370 context. The SLC7A5P1 gene is also predicted to be linked to NK cells  
371 (GO:0032825~positive regulation of natural killer cell differentiation) whereas SRGAP2C  
372 had already be linked to HRSV bronchiolitis. Interestingly, we also observed the significant  
373 downregulation of several miRNAs. Among them, some are already described in literature



374 such as miRNA-572, prognosis biomarker for renal cell carcinoma and sclerosis [44,45], or  
375 miRNA-769, included in a miRNA panel for discrimination between *Mycobacterium*  
376 *tuberculosis* infected and healthy individuals [46].

377 Regardless of the studied tissue, HRSV is consensually described as a major disruptor of the  
378 host immune response [47–49]. Here, comparing our signatures with 3 other ones extracted  
379 from pediatric whole blood transcriptomic analyses [28–30], we highlighted the common  
380 deregulation of 7 genes, independently of the tissue, and interestingly, 242 genes that seem to  
381 be specific to nasal epithelium HRSV-induced gene expression. This type of experiment had  
382 already been experimented in mice by Pennings et al., across three murine tissues (lung,  
383 bronchial lymph nodes and blood) [50]. They only found 53 genes regulated in common  
384 between the three tissues, notably GBP1, GBP2, GZMB, IFI44L, IFIT1, IFIT3, IFITM3,  
385 IRF7 and RTP4 genes, also significantly modulated in our study. By contrast, they described  
386 the GO/UniProt functional terms “acute phase”, “chemokine cytokine activity” and “antigen  
387 processing” to be characteristically attached to the lung signatures. This last term was  
388 specifically enriched in our study (GO:0002479 : HLA-H, PSMB6, PSMB3, PSMC1, HLA-C,  
389 HLA-B, HLA-E, PSMB9, B2M), even if the global epithelium signature seems to evolve  
390 around the host immune response to infection.

391 Collectively, the transcriptomic analysis of nasal wash samples highlights the qualitative  
392 importance of such clinical samples, particularly in the context of their limited availability.  
393 The results obtained with a complementary approach such as the reconstituted HAE greatly  
394 contribute to bridge the knowledge gap in the understanding of the specific effects of HRSV  
395 on the host respiratory tissue and pave the way for several so far undescribed avenues of  
396 investigation.

397

398

399 **Figure legends**

400 **Figure 1.** Sample processing workflow and transcriptomic hierarchical clustering

401 **Figure 2.** Gene Ontology-based functional enrichment and protein-protein interaction

402 network analyses

403 **Figure 3.** Gene expression cross-analysis as a key to tissue-specific local reaction to infection

404 **Figure 4.** Experimental validation of gene expression results by NanoString assay in human

405 airway epithelia (HAE)

406 **Supplementary Table 1.** Minimal quantities requested for microarray hybridization and

407 homogeneity between samples

408 **Supplementary Table 2.** Gene expression results (*available upon request*)

409 **Supplementary Figure 1.** miRNA differential and functional analysis

410

411 **References**

- 412 1. Nair H, Nokes DJ, Gessner BD, et al. Global burden of acute lower respiratory  
413 infections due to respiratory syncytial virus in young children: a systematic review and  
414 meta-analysis. *Lancet* [Internet]. **2010**; 375(9725):1545–1555. Available from:  
415 <https://linkinghub.elsevier.com/retrieve/pii/S0140673610602061>
- 416 2. Falsey AR, Hennessey PA, Formica MA, Cox C, Walsh EE. Respiratory Syncytial  
417 Virus Infection in Elderly and High-Risk Adults. *N Engl J Med* [Internet].  
418 Massachusetts Medical Society ; **2005** [cited 2019 Mar 26]; 352(17):1749–1759.  
419 Available from: <http://www.nejm.org/doi/abs/10.1056/NEJMoa043951>
- 420 3. Hall CB, Simões EAF, Anderson LJ. Clinical and Epidemiologic Features of  
421 Respiratory Syncytial Virus. Springer, Berlin, Heidelberg; 2013 [cited 2019 Nov 7]. p.  
422 39–57. Available from: [http://link.springer.com/10.1007/978-3-642-38919-1\\_2](http://link.springer.com/10.1007/978-3-642-38919-1_2)
- 423 4. Griffiths C, Drews SJ, Marchant DJ. Respiratory Syncytial Virus: Infection, Detection,  
424 and New Options for Prevention and Treatment. *Clin Microbiol Rev* [Internet].  
425 American Society for Microbiology (ASM); **2017** [cited 2019 Nov 7]; 30(1):277–319.  
426 Available from: <http://www.ncbi.nlm.nih.gov/pubmed/27903593>
- 427 5. Durbin JE, Johnson TR, Durbin RK, et al. The role of IFN in respiratory syncytial virus  
428 pathogenesis. *J Immunol* [Internet]. American Association of Immunologists; **2002**  
429 [cited 2019 Nov 7]; 168(6):2944–52. Available from:  
430 <http://www.ncbi.nlm.nih.gov/pubmed/8345194>
- 431 6. Ramaswamy M, Shi L, Monick MM, Hunninghake GW, Look DC. Specific Inhibition  
432 of Type I Interferon Signal Transduction by Respiratory Syncytial Virus. *Am J Respir*  
433 *Cell Mol Biol* [Internet]. American Thoracic Society; **2004** [cited 2019 Nov 7];  
434 30(6):893–900. Available from:  
435 <http://www.atsjournals.org/doi/abs/10.1165/rcmb.2003-0410OC>

- 436 7. Tripp RA, Oshansky C, Alvarez R. Cytokines and Respiratory Syncytial Virus  
437 Infection. *Proc Am Thorac Soc* [Internet]. **2005** [cited 2019 Nov 7]; 2(2):147–149.  
438 Available from: <http://pats.atsjournals.org/cgi/doi/10.1513/pats.200502-014AW>
- 439 8. Russell CD, Unger SA, Walton M, Schwarze J. The Human Immune Response to  
440 Respiratory Syncytial Virus Infection. *Clin Microbiol Rev* [Internet]. American Society  
441 for Microbiology (ASM); **2017** [cited 2019 Nov 7]; 30(2):481–502. Available from:  
442 <http://www.ncbi.nlm.nih.gov/pubmed/28179378>
- 443 9. Machado D, Hoffmann J, Moroso M, et al. RSV Infection in Human Macrophages  
444 Promotes CXCL10/IP-10 Expression during Bacterial Co-Infection. *Int J Mol Sci*  
445 [Internet]. Multidisciplinary Digital Publishing Institute; **2017** [cited 2019 Mar 22];  
446 18(12):2654. Available from: <http://www.mdpi.com/1422-0067/18/12/2654>
- 447 10. Machado D, Pizzorno A, Hoffmann J, et al. Role of p53/NF- $\kappa$ B functional balance in  
448 respiratory syncytial virus-induced inflammation response. *J Gen Virol* [Internet].  
449 Microbiology Society; **2018** [cited 2019 Nov 7]; 99(4):489–500. Available from:  
450 <https://www.microbiologyresearch.org/content/journal/jgv/10.1099/jgv.0.001040>
- 451 11. Nicolas de Lamballerie C, Pizzorno A, Dubois J, et al. Characterization of cellular  
452 transcriptomic signatures induced by different respiratory viruses in human  
453 reconstituted airway epithelia. *Sci Rep* [Internet]. Nature Publishing Group; **2019**  
454 [cited 2019 Nov 7]; 9(1):11493. Available from:  
455 <http://www.ncbi.nlm.nih.gov/pubmed/31391513>
- 456 12. Parnell GP, McLean AS, Booth DR, et al. A distinct influenza infection signature in  
457 the blood transcriptome of patients with severe community-acquired pneumonia. *Crit*  
458 *Care* [Internet]. BioMed Central; **2012** [cited 2019 Nov 7]; 16(4):R157. Available from:  
459 <http://www.ncbi.nlm.nih.gov/pubmed/22898401>
- 460 13. Hancock AS, Stairiker CJ, Boesteanu AC, et al. Transcriptome Analysis of Infected

- 461 and Bystander Type 2 Alveolar Epithelial Cells during Influenza A Virus Infection  
462 Reveals In Vivo Wnt Pathway Downregulation. *J Virol* [Internet]. American Society  
463 for Microbiology (ASM); **2018** [cited 2019 Nov 7]; 92(21). Available from:  
464 <http://www.ncbi.nlm.nih.gov/pubmed/30111569>
- 465 14. Troy NM, Bosco A. Respiratory viral infections and host responses; insights from  
466 genomics. *Respir Res.* **2016**; 17(1):1–12.
- 467 15. Zaas AK, Chen M, Varkey J, et al. Gene Expression Signatures Diagnose Influenza  
468 and Other Symptomatic Respiratory Viral Infection in Humans. *Cell Host Microbe.*  
469 **2009**; 6(3):207–217.
- 470 16. Levitz R, Gao Y, Dozmorov I, Song R, Wakeland EK, Kahn JS. Distinct patterns of  
471 innate immune activation by clinical isolates of respiratory syncytial virus. *PLoS One*  
472 [Internet]. Public Library of Science; **2017** [cited 2019 Nov 7]; 12(9):e0184318.  
473 Available from: <http://www.ncbi.nlm.nih.gov/pubmed/28877226>
- 474 17. Do LAH, Pellet J, Doorn HR van, et al. Host Transcription Profile in Nasal Epithelium  
475 and Whole Blood of Hospitalized Children Under 2 Years of Age With Respiratory  
476 Syncytial Virus Infection. *J Infect Dis* [Internet]. Oxford University Press; **2017** [cited  
477 2019 Nov 5]; 217(1):134–146. Available from:  
478 <http://www.ncbi.nlm.nih.gov/pubmed/29029245>
- 479 18. Ampuero S, Andaur R, Milano M, et al. Time-course of transcriptome response to  
480 respiratory syncytial virus infection in lung epithelium cells. *Acta Virol* [Internet].  
481 **2018** [cited 2019 Nov 7]; 62(03):310–325. Available from:  
482 [http://www.elis.sk/index.php?page=shop.product\\_details&flypage=flypage.tpl&produc](http://www.elis.sk/index.php?page=shop.product_details&flypage=flypage.tpl&product_id=5804&category_id=145&option=com_virtuemart)  
483 [t\\_id=5804&category\\_id=145&option=com\\_virtuemart](http://www.elis.sk/index.php?page=shop.product_details&flypage=flypage.tpl&product_id=5804&category_id=145&option=com_virtuemart)
- 484 19. Dupinay T, Nguyen A, Croze S, et al. Next-generation sequencing of ultra-low copy  
485 samples : from clinical FFPE samples to single-cell sequencing. *Curr Top Virol*

- 486 [Internet]. **2012** [cited 2019 Mar 21]; 10(June 2015):63–83. Available from:  
487 [https://www.researchgate.net/publication/278684713\\_Next-](https://www.researchgate.net/publication/278684713_Next-generation_sequencing_of_ultra-low_copy_samples_from_clinical_FFPE_samples_to_single-cell_sequencing)  
488 [generation\\_sequencing\\_of\\_ultra-](https://www.researchgate.net/publication/278684713_Next-generation_sequencing_of_ultra-low_copy_samples_from_clinical_FFPE_samples_to_single-cell_sequencing)  
489 [low\\_copy\\_samples\\_from\\_clinical\\_FFPE\\_samples\\_to\\_single-cell\\_sequencing](https://www.researchgate.net/publication/278684713_Next-generation_sequencing_of_ultra-low_copy_samples_from_clinical_FFPE_samples_to_single-cell_sequencing)
- 490 20. Degletagne C, Keime C, Rey B, et al. Transcriptome analysis in non-model species: a  
491 new method for the analysis of heterologous hybridization on microarrays. *BMC*  
492 *Genomics* [Internet]. BioMed Central; **2010** [cited 2019 Mar 21]; 11:344. Available  
493 from: <http://www.ncbi.nlm.nih.gov/pubmed/20509979>
- 494 21. Pizzorno A, Terrier O, Nicolas de Lamballerie C, et al. Repurposing of Drugs as Novel  
495 Influenza Inhibitors From Clinical Gene Expression Infection Signatures. *Front*  
496 *Immunol* [Internet]. Frontiers; **2019** [cited 2019 Mar 22]; 10:60. Available from:  
497 <https://www.frontiersin.org/article/10.3389/fimmu.2019.00060/full>
- 498 22. Ritchie ME, Phipson B, Wu D, et al. limma powers differential expression analyses for  
499 RNA-sequencing and microarray studies. *Nucleic Acids Res* [Internet]. **2015** [cited  
500 2017 Nov 14]; 43(7). Available from:  
501 <https://www.ncbi.nlm.nih.gov/pmc/articles/PMC4402510/pdf/gkv007.pdf>
- 502 23. Dennis G, Sherman BT, Hosack DA, et al. DAVID: Database for Annotation,  
503 Visualization, and Integrated Discovery. *Genome Biol* [Internet]. **2003** [cited 2019 Mar  
504 21]; 4(5):P3. Available from: <http://www.ncbi.nlm.nih.gov/pubmed/12734009>
- 505 24. Lewis BP, Shih IH, Jones-Rhoades MW, Bartel DP, Burge CB. Prediction of  
506 Mammalian MicroRNA Targets. *Cell*. Cell Press; **2003**; 115(7):787–798.
- 507 25. Szklarczyk D, Franceschini A, Wyder S, et al. STRING v10: protein–protein  
508 interaction networks, integrated over the tree of life. *Nucleic Acids Res* [Internet]. **2015**  
509 [cited 2019 Mar 21]; 43(D1):D447–D452. Available from:  
510 <http://www.ncbi.nlm.nih.gov/pubmed/25352553>

- 511 26. S. VD. Graph clustering by flow simulation. 2000.
- 512 27. Tsang H-F, Xue VW, Koh S-P, Chiu Y-M, Ng LP-W, Wong S-CC. NanoString, a  
513 novel digital color-coded barcode technology: current and future applications in  
514 molecular diagnostics. *Expert Rev Mol Diagn* [Internet]. **2017** [cited 2019 Apr 10];  
515 17(1):95–103. Available from: <http://www.ncbi.nlm.nih.gov/pubmed/27917695>
- 516 28. Jong VL, Ahout IML, Ham H-J Van Den, et al. Transcriptome assists prognosis of  
517 disease severity in respiratory syncytial virus infected infants. *Nat Publ Gr*. **2016**; .
- 518 29. Ioannidis I, McNally B, Willette M, et al. Plasticity and Virus Specificity of the  
519 Airway Epithelial Cell Immune Response during Respiratory Virus Infection. *J Virol*.  
520 American Society for Microbiology; **2012**; 86(10):5422–5436.
- 521 30. Brand HK, Ahout IML, Ridder D De, et al. Olfactomedin 4 serves as a marker for  
522 disease severity in pediatric respiratory syncytial virus (RSV) infection. *PLoS One*.  
523 Public Library of Science; **2015**; 10(7).
- 524 31. McNamara PS, Flanagan BF, Hart CA, Smyth RL. Production of Chemokines in the  
525 Lungs of Infants with Severe Respiratory Syncytial Virus Bronchiolitis. *J Infect Dis*  
526 [Internet]. **2005** [cited 2019 Nov 13]; 191(8):1225–1232. Available from:  
527 <https://academic.oup.com/jid/article-lookup/doi/10.1086/428855>
- 528 32. Chen Y, Hamati E, Lee PK, et al. Rhinovirus induces airway epithelial gene expression  
529 through double-stranded RNA and IFN-dependent pathways. *Am J Respir Cell Mol*  
530 *Biol*. American Thoracic Society; **2006**; 34(2):192–203.
- 531 33. Wang G, Jiang L, Wang J, et al. The G Protein-Coupled Receptor FFAR2 Promotes  
532 Internalization during Influenza A Virus Entry. *J Virol*. American Society for  
533 Microbiology; **2019**; 94(2).
- 534 34. Mejias A, Dimo B, Suarez NM, et al. Whole Blood Gene Expression Profiles to Assess  
535 Pathogenesis and Disease Severity in Infants with Respiratory Syncytial Virus

- 536 Infection. PLoS Med. **2013**; 10(11).
- 537 35. Qi Y, Li Y, Zhang Y, et al. IFI6 Inhibits Apoptosis via Mitochondrial-Dependent  
538 Pathway in Dengue Virus 2 Infected Vascular Endothelial Cells. Jin X, editor. PLoS  
539 One [Internet]. Public Library of Science; **2015** [cited 2020 Apr 15]; 10(8):e0132743.  
540 Available from: <https://dx.plos.org/10.1371/journal.pone.0132743>
- 541 36. Meyer K, Kwon YC, Liu S, Hagedorn CH, Ray RB, Ray R. Interferon- $\alpha$  inducible  
542 protein 6 impairs EGFR activation by CD81 and inhibits hepatitis C virus infection. Sci  
543 Rep. Nature Publishing Group; **2015**; 5(1):1–10.
- 544 37. Hackett NR, Butler MW, Shaykhiev R, et al. RNA-Seq quantification of the human  
545 small airway epithelium transcriptome. BMC Genomics. BioMed Central; **2012**;  
546 13(1):82.
- 547 38. Raman K, O'Donnell MJ, Czlonkowska A, et al. Peripheral Blood MCEMP1 Gene  
548 Expression as a Biomarker for Stroke Prognosis. Stroke. Lippincott Williams and  
549 Wilkins; **2016**; 47(3):652–658.
- 550 39. Bataki EL, Evans GS, Everard ML. Respiratory syncytial virus and neutrophil  
551 activation. Clin Exp Immunol. **2005**; 140(3):470–477.
- 552 40. Heo JY, Song JY, Noh JY, et al. Effects of influenza immunization on pneumonia in  
553 the elderly. Hum. Vaccines Immunother. Taylor and Francis Inc.; 2018. p. 744–749.
- 554 41. Bosch AATM, Biesbroek G, Trzcinski K, Sanders EAM, Bogaert D. Viral and  
555 Bacterial Interactions in the Upper Respiratory Tract. PLoS Pathog. Public Library of  
556 Science; 2013.
- 557 42. Hansasuta P, Dong T, Thananchai H, et al. Recognition of HLA-A3 and HLA-A11 by  
558 KIR3DL2 is peptide-specific. Eur J Immunol. **2004**; 34(6):1673–1679.
- 559 43. Cosman D, Fanger N, Borges L, et al. A novel immunoglobulin superfamily receptor  
560 for cellular and viral MHC class I molecules. Immunity. Cell Press; **1997**; 7(2):273–



- 561 282.
- 562 44. Pan X, Li Z, Zhao L, et al. microRNA-572 functions as an oncogene and a potential  
563 biomarker for renal cell carcinoma prognosis. *Oncol Rep [Internet]. Spandidos*  
564 *Publications*; **2018** [cited 2020 Apr 15]; 40(5):3092–3101. Available from:  
565 <http://www.ncbi.nlm.nih.gov/pubmed/30132566>
- 566 45. Mancuso R, Hernis A, Agostini S, Rovaris M, Caputo D, Clerici M. MicroRNA-572  
567 expression in multiple sclerosis patients with different patterns of clinical progression.  
568 *J Transl Med [Internet]. BioMed Central Ltd.*; **2015** [cited 2020 Apr 15]; 13(1):148.  
569 Available from: <http://www.translational-medicine.com/content/13/1/148>
- 570 46. Cui JY, Liang HW, Pan XL, et al. Characterization of a novel panel of plasma  
571 microRNAs that discriminates between Mycobacterium tuberculosis infection and  
572 healthy individuals. *PLoS One. Public Library of Science*; **2017**; 12(9).
- 573 47. Hijano DR, Vu LD, Kauvar LM, Tripp RA, Polack FP, Cormier SA. Role of Type I  
574 Interferon (IFN) in the Respiratory Syncytial Virus (RSV) Immune Response and  
575 Disease Severity. *Front Immunol [Internet]. Frontiers*; **2019** [cited 2019 Jun 6]; 10:566.  
576 Available from: <https://www.frontiersin.org/article/10.3389/fimmu.2019.00566/full>
- 577 48. Heinonen S, Rodriguez-Fernandez R, Diaz A, Rodriguez-Pastor SO, Ramilo O, Mejias  
578 A. Infant Immune Response to Respiratory Viral Infections. *Immunol. Allergy Clin.*  
579 *North Am. W.B. Saunders*; 2019. p. 361–376.
- 580 49. Carvajal JJ, Avellaneda AM, Salazar-Ardiles C, Maya JE, Kalergis AM, Lay MK. Host  
581 Components Contributing to Respiratory Syncytial Virus Pathogenesis. *Front.*  
582 *Immunol. Frontiers Media S.A.*; 2019. p. 2152.
- 583 50. Pennings JLA, Schuurhof A, Hodemaekers HM, et al. Systemic Signature of the Lung  
584 Response to Respiratory Syncytial Virus Infection. Ahuja SK, editor. *PLoS One*  
585 [Internet]. *Public Library of Science*; **2011** [cited 2020 Apr 6]; 6(6):e21461. Available

586 from: <https://dx.plos.org/10.1371/journal.pone.0021461>

587

588

### 589 **Acknowledgements**

590 The authors want to thank Sophie Assant for her help with the NanoString nCounter assay  
591 and Epithelix (Switzerland) for its help with MucilAir® human airway epithelia (HAE). This  
592 work was funded by grants from Région Auvergne Rhône-Alpes (CMIRA N° 14007029 and  
593 AccueilPro COOPERA N°15458 grants), and Canadian Institutes of Health Research (N°  
594 229733 and 230187). Claire Nicolas de Lamballerie was funded by National Association for  
595 Research in Technology (ANRT). Guy Boivin is the holder of the Canada Research Chair on  
596 influenza and other respiratory viruses. Funding institutions had no participation in the design  
597 of the study, collection, analysis and interpretation of data, or in the writing of the manuscript.

598

### 599 **Author contributions**

600 CNDL, AP, BL, GB, CLL, OT, MRC participated to conception and coordination of the study.  
601 CNDL, AP, BP, JC, EO, TJ, AT, BL, MEH, MR, JT, GB, CLL, OT, MRC carried out the  
602 experiments and analysis of the results. CNDL, JD, OT, AP, MRC designed the study and  
603 wrote the manuscript.

604

### 605 **Competing interests**

606 The authors declare they have no competing interests.

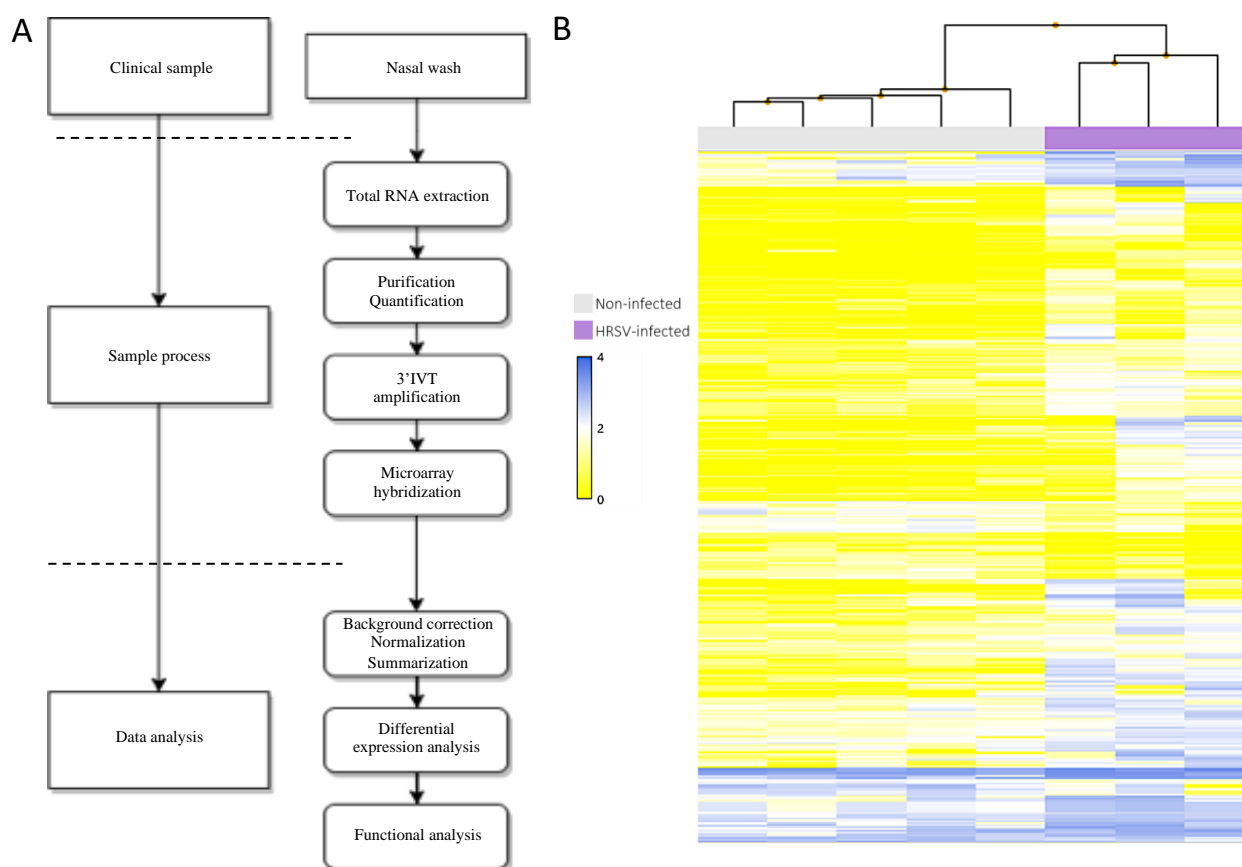

**Figure 1. Sample processing workflow and transcriptomic hierarchical clustering.** (A) Adapted workflow for the processing and exploitation of clinical samples with low RNA quality/quantity. (B) Hierarchical clustering of the signal intensities corresponding to all infected and non-infected clinical samples evaluated in the study. The resulting clusters are representative of the degree of similarity between samples and enable clustering into infected and non-infected experimental groups. The height of the y-axis at the branching points is a measure of similarity; y-axis units are arbitrary. For representation purposes, data was auto-scaled and log<sub>2</sub> transformed.

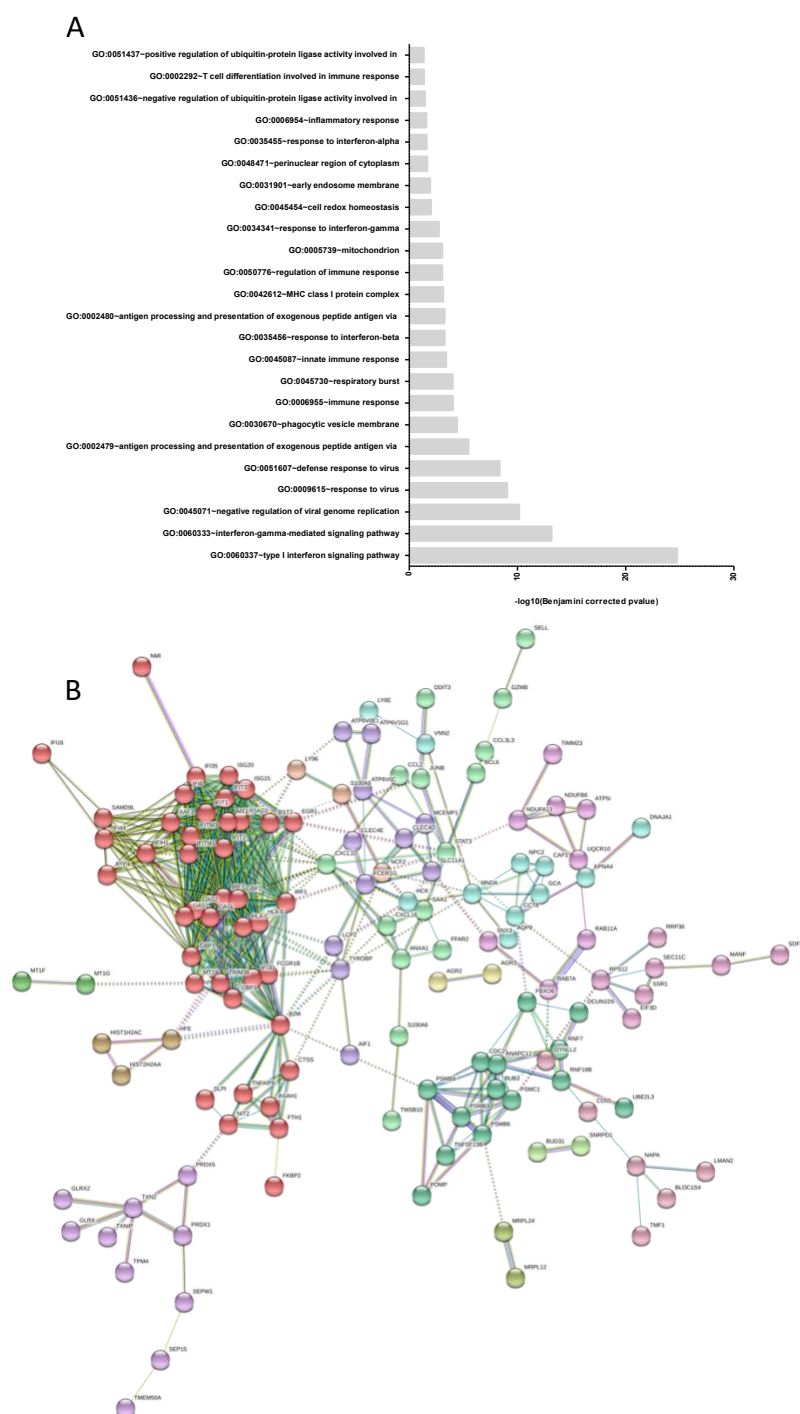

**Figure 2. Gene Ontology-based functional enrichment and protein-protein interaction analyses. (A)** Enriched biological process terms corresponding to the up-regulated gene list (enrichment score >2 and Benjamini-Hochberg corrected p-value <0.05). The down-regulated gene list did not present sufficient enrichment to pass our thresholds. **(B)** Evidence view of predicted protein associations associated with up-regulated genes in the HRSV-infected condition. Network nodes are host proteins and edges represent predicted functional associations. The color-coded lines correspond to the types of evidence supporting predicted associations (minimum required interaction score: 0.7). Node colors correspond to Markov clusters (MCL, inflation parameter: 1.5).

**Figure 3**

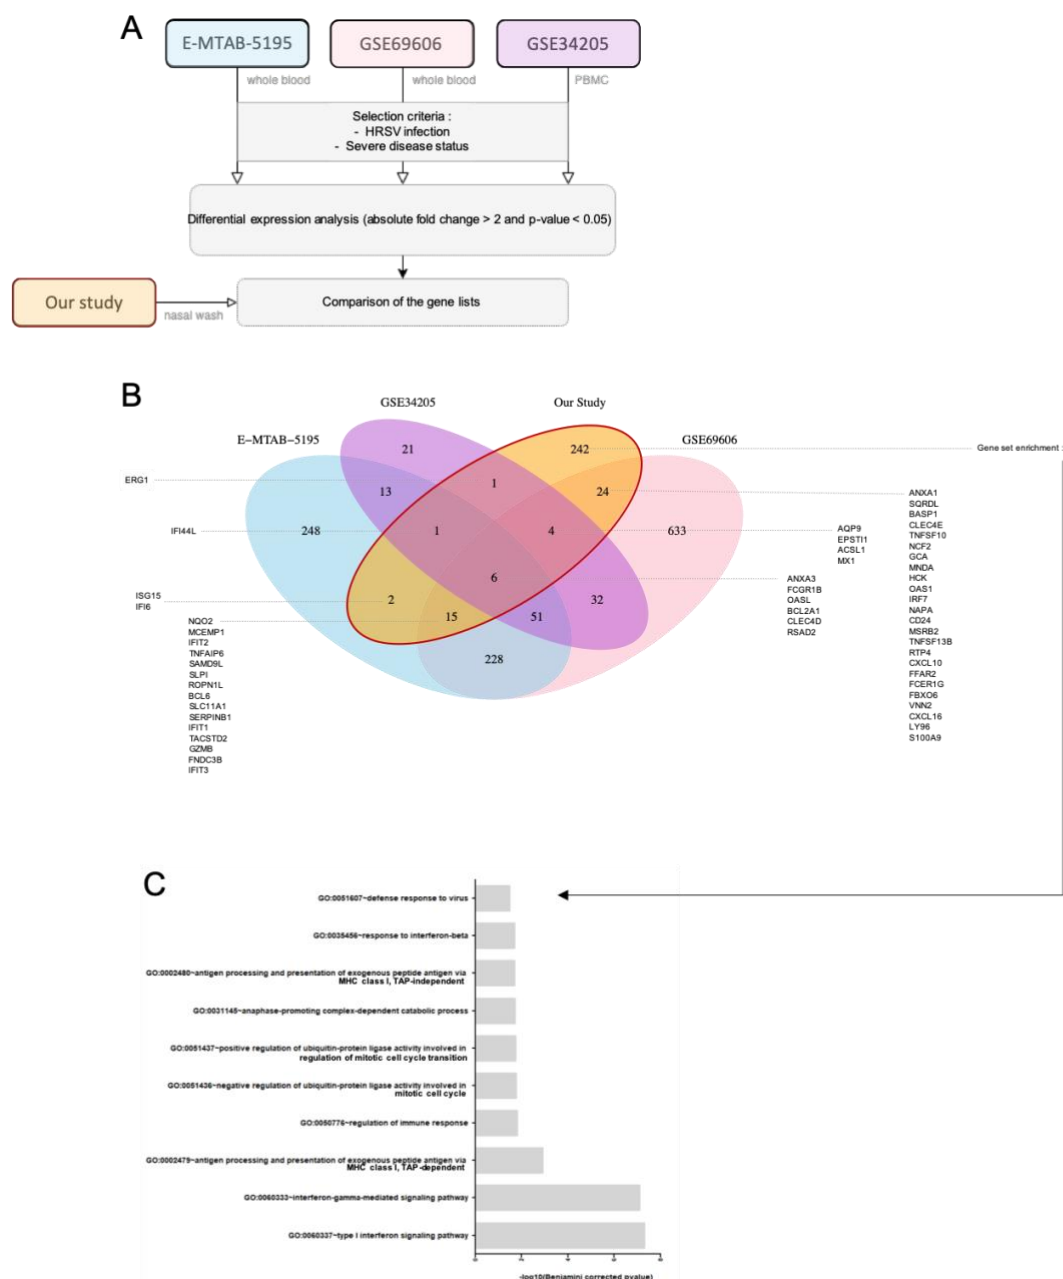

**Figure 3. Gene expression cross-analysis as a key to tissue-specific local reaction to infection. (A)** We selected 3 pediatric mRNA expression datasets for gene expression comparison across tissues. The GSE69606 dataset combines samples from 26 patients with acute HRSV infections, with symptoms spanning from mild to severe and the corresponding recovery paired samples. The E-MTAB-5195 dataset was originally used to investigate blood transcriptomics of 39 children during HRSV infection and for a longitudinal analysis to determine an 84-gene prognosis signature discriminating hospitalized infants with severe HRSV disease from infants with mild symptoms. The GSE34205 dataset is part of a wider study (GSE32140), aiming at establishing the signature induced by influenza and HRSV on PBMCs and primary airway epithelial cells. Because of the disease status of our study samples, we focused on severely ill children infected by HRSV. **(B)** Comparative cross-analysis of the gene lists on the 4 datasets (3 external plus ours). Common and specific infection features and gene enrichment analysis applied to the 242 nasal-specific genes are shown.

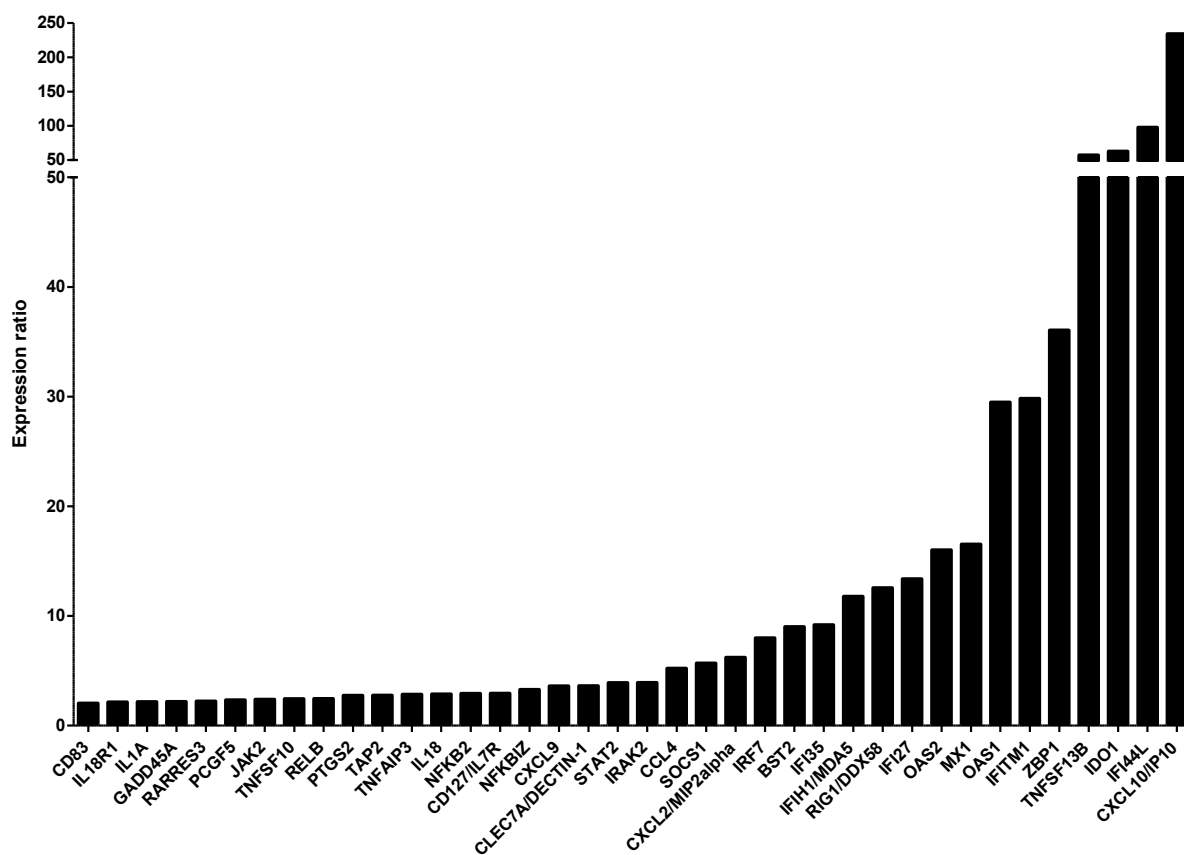

**Figure 4. Experimental validation of gene expression results by NanoString assay in human airway epithelia (HAE).** The expression of immunity-related genes in infected nasal HAE was validated using Nanostring nCounter technology. Data processing and normalization were performed with nSolver 4.0 analysis software and significant results (absolute fold change > 2) are expressed in fold change induction compared to the mock-infected condition.

| Infection Status | Sample ID | Sample type | RIN after RNA extraction | Initial concentration quantification (ng/ $\mu$ L) | RIN after purification | Concentration after purification (ng/ $\mu$ l) | cRNA quantification after amplification and purification ( $\mu$ g) | cDNA quantity (ng/ $\mu$ l) after conversion | cDNA quantification after conversion ( $\mu$ g) |
|------------------|-----------|-------------|--------------------------|----------------------------------------------------|------------------------|------------------------------------------------|---------------------------------------------------------------------|----------------------------------------------|-------------------------------------------------|
| Non-infected     | 1         | Total RNA   | 2.6                      | 0.68                                               | 1                      | 0.11                                           | 7.835                                                               | 166.78                                       | 5.3                                             |
| Non-infected     | 2         | Total RNA   | 2.6                      | 0.67                                               | 1                      | 0.27                                           | 5.225                                                               | 205.78                                       | 6.6                                             |
| Non-infected     | 3         | Total RNA   | 2.6                      | 1.6                                                | 1                      | 0.084                                          | 4.92                                                                | 130.11                                       | 4.2                                             |
| Non-infected     | 4         | Total RNA   | 1.2                      | 0.27                                               | Not Available          | 0.012                                          | 10.87                                                               | 250.85                                       | 7.0                                             |
| Non-infected     | 5         | Total RNA   | Not Available            | 40                                                 | 1                      | 1                                              | 16.54                                                               | 314.3                                        | 8.8                                             |
| HRSV-infected    | 6         | Total RNA   | 2.6                      | 0.790                                              | Not Available          | 0.04                                           | 21.52                                                               | 280.24                                       | 7.85                                            |
| HRSV-infected    | 7         | Total RNA   | 2.6                      | 0.880                                              | 1                      | 0.023                                          | 18.49                                                               | 369.48                                       | 10.3                                            |
| HRSV-infected    | 8         | Total RNA   | 2.6                      | 1.100                                              | 1                      | 0.077                                          | 5.975                                                               | 198.28                                       | 6.3                                             |

**Suppl. Table 1: Minimal quantities requested for microarray hybridization and homogeneity between samples are respected post amplification.** The 8 samples (3 infected and 5 non-infected) were quantified and qualified after total RNA extraction (Quantifluor RNA System, Promega). The low quantity/quality observed after purification determined the need for subsequent amplification of the samples for hybridization. Samples underwent 3 rounds of unbiased *in vitro* amplification and sufficient cRNA was obtained to be used as cDNA template. Minimal quantities requested for hybridization on Affymetrix Human Genechip™ 2.0 ST Array were reached for all samples after three rounds of *in vitro* transcription.

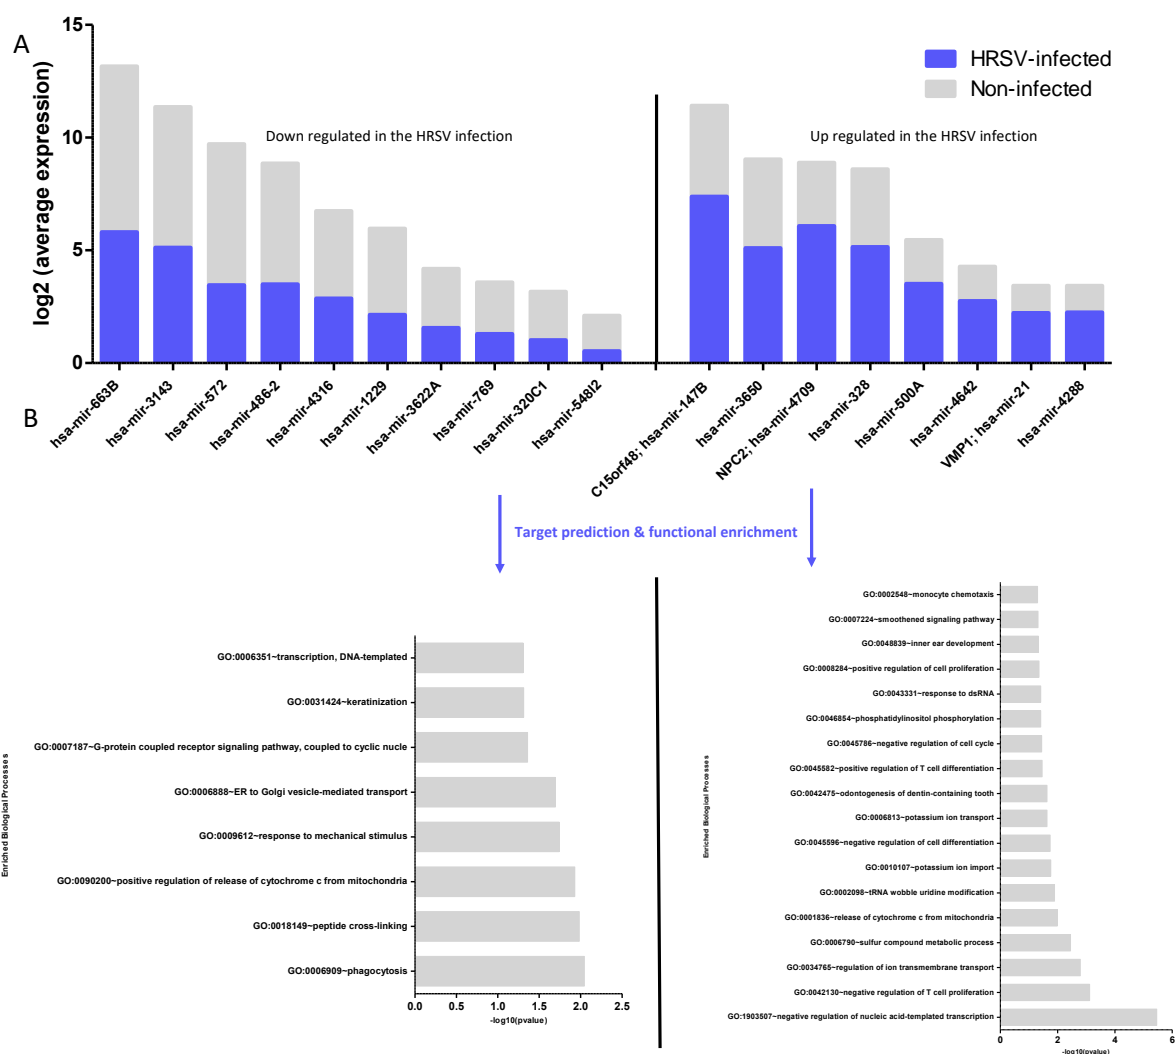

**Supp Figure 1. miRNA differential and functional analysis.** (A) Log<sub>2</sub> average expression values of both up- and down-regulated miR were extracted from the differential expression gene list (absolute fold change > 2 and p-value < 0.05). The identification of all genes targeted by at least one of the miRNAs was performed with the target prediction algorithm TargetScan 7.2. (B) Functional enrichment analysis (DAVID 6.8) of predicted biological targets to capture the involvement of such genes in several biological processes is shown
